# Supplementary material for: Epistasis of Transcriptomes Reveals Synergism between Transcriptional Activators Hnf1α and Hnf4α
Source: PubMed Central journal article supplement (PMC2877749; doi:10.1371/journal.pgen.1000970), 2010-05-27

# Expression of Hnf1 $\alpha$ -bound *Hnf1a*-dependent genes in *Hnf4a*<sup>pKO</sup> islets

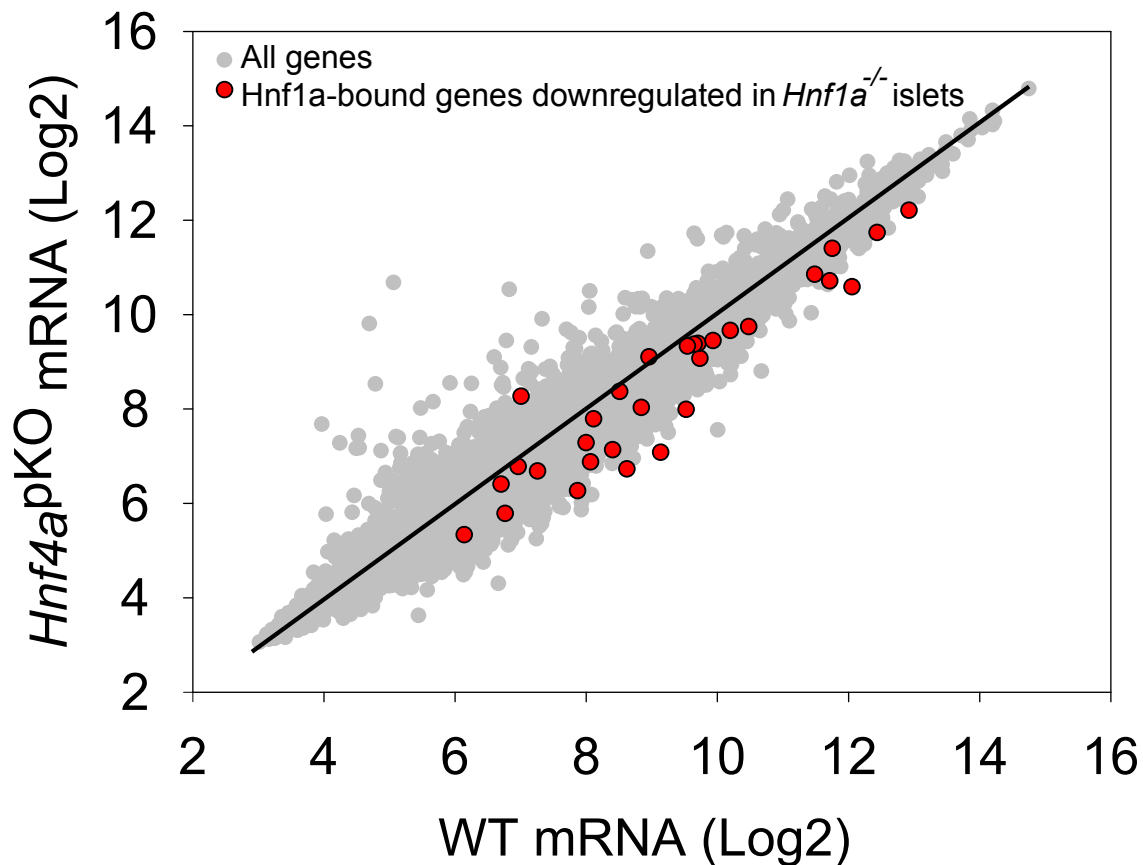

Supplement: pgen.1000970.s005.pdf [file pgen.1000970.s005.pdf]
