# Supplementary material for: Epistasis of Transcriptomes Reveals Synergism between Transcriptional Activators Hnf1α and Hnf4α
Source: PubMed Central journal article supplement (PMC2877749; doi:10.1371/journal.pgen.1000970), 2010-05-27

**Mutant/wild type**  
**gene expression ratio (Taqman)**

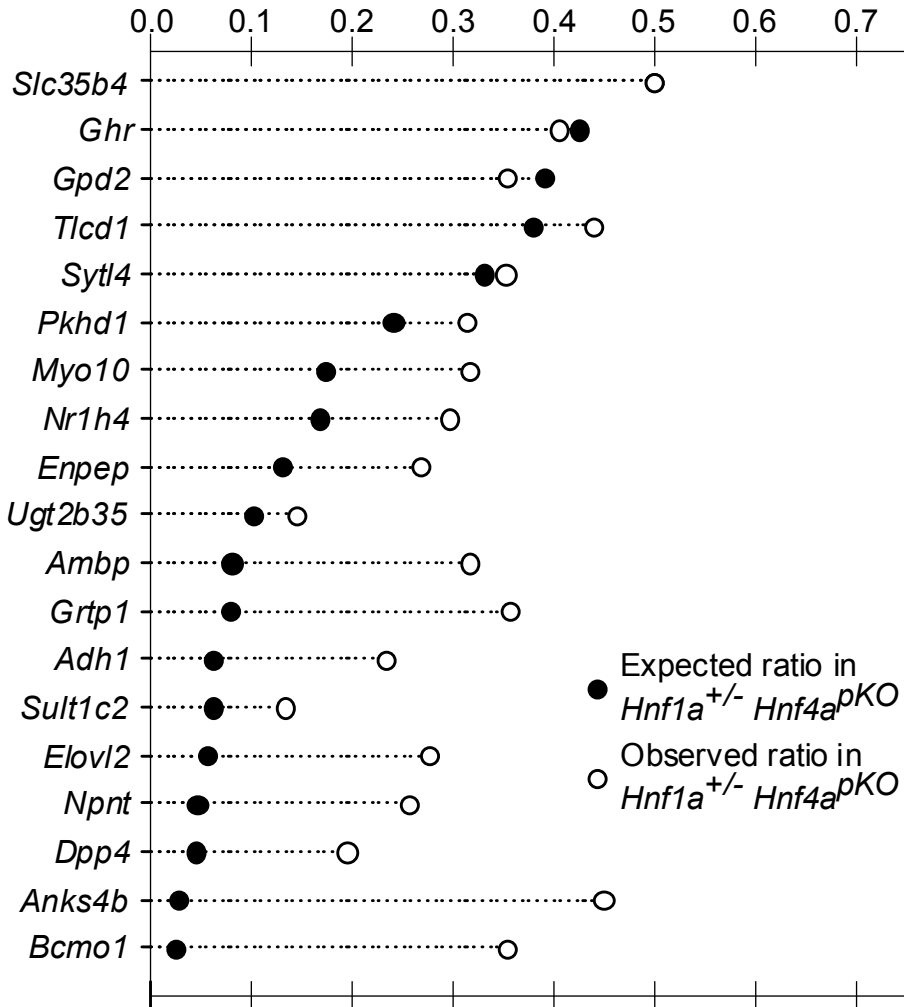

Supplement: pgen.1000970.s006.pdf [file pgen.1000970.s006.pdf]
