# Supplementary material for: Epistasis of Transcriptomes Reveals Synergism between Transcriptional Activators Hnf1α and Hnf4α
Source: PubMed Central journal article supplement (PMC2877749; doi:10.1371/journal.pgen.1000970), 2010-05-27
Supplement: pgen.1000970.s010.pdf [file pgen.1000970.s010.pdf]

**SUPPL. TABLE 2** Overrepresentation of functional classes among regulated genes in *Hnf4a*<sup>pKO</sup> islets

**I. Downregulated Genes in *Hnf4a*<sup>pKO</sup> islets**

**Functional Annotation Clustering (DAVID 2008)**

| <b>Representative Terms in Cluster</b>                     | <b>Fisher Exact p value</b> |
|------------------------------------------------------------|-----------------------------|
| Transmembrane region                                       | 0.01                        |
| Selenium binding                                           | 0.02                        |
| Intercellular junction                                     | 0.03                        |
| Symporter activity, Ion transmembrane transporter activity | 0.04                        |
| Sulfotransferase activity                                  | 0.04                        |
| Sugar transport                                            | 0.05                        |
| Signal transduction                                        | 0.06                        |

**Gene Set Enrichment Analysis of Pathways**

| <b>Pathway</b>                                | <b>Nominal p value</b> | <b>FDR q value</b> |
|-----------------------------------------------|------------------------|--------------------|
| GHPATHWAY (BioCarta)                          | <0.0001                | 0.019              |
| BIOSYNTHESIS_OF_STEROIDS (KEGG)               | <0.0001                | 0.031              |
| HSA01032_GLYCAN_STRUCTURES_DEGRADATION (KEGG) | <0.0001                | 0.042              |
| HSA00450_SELENOAMINO_ACID_METABOLISM (KEGG)   | <0.0001                | 0.114              |
| ERK5PATHWAY (BioCarta)                        | <0.0001                | 0.131              |
| WNTPATHWAY (BioCarta)                         | <0.0001                | 0.147              |
| RARRXRPATHWAY (BioCarta)                      | <0.0001                | 0.196              |

**II. Upregulated Genes in *Hnf4a*<sup>pKO</sup> islets**

**Functional Annotation Clustering (DAVID 2008)**

| <b>Representative Terms in Cluster</b> | <b>Fisher Exact p value</b> |
|----------------------------------------|-----------------------------|
| Transmembrane region                   | 0.01                        |
| Secreted; extracellular space          | 0.04                        |
| Lysosome                               | 0.01                        |
| Cytokine activity                      | 0.04                        |
| Polyamine metabolic process            | 0.02                        |
| MAPK signaling pathway                 | 0.05                        |
| Cell adhesion                          | 0.04                        |
| Response to stress                     | 0.07                        |
| Extracellular matrix                   | 0.10                        |

**Gene Set Enrichment Analysis of Pathways**

| <b>Pathway</b>                                                                 | <b>Nominal p value</b> | <b>FDR q value</b> |
|--------------------------------------------------------------------------------|------------------------|--------------------|
| Up-regulated during TGFbeta-induced epithelial-to-mesenchymal transition (EMT) | <0.0001                | <0.0001            |
| MAPK_SIGNALING_PATHWAY (Kegg)                                                  | <0.0001                | 0.021              |
| Upregulated by hypoxia in normal fibroblasts                                   | <0.0001                | <0.0001            |
| TGF_BETA_SIGNALING_PATHWAY (Kegg)                                              | <0.0001                | 0.023              |
| REGULATION_OF_ACTIN_CYTOSKELETON (Kegg)                                        | <0.0001                | 0.114              |
| LEUKOCYTE_TRANSENDOTHELIAL_MIGRATION (Kegg)                                    | <0.0001                | 0.002              |
| INTEGRINPATHWAY (Biocarta)                                                     | <0.0001                | 0.001              |
| TGF_BETA_SIGNALING_PATHWAY (Biocarta)                                          | <0.0001                | 0.196              |
